# Supplementary material for: Combining physical vapor deposition structuration with dealloying for the creation of a highly efficient SERS platform
Source: publisher site journal article supplement (doi:10.3762/bjnano.14.10), 2023-01-11
Supplement: Additional file 1 [file 2190-4286-14-10-S1.pdf]

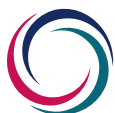

## Supporting Information

for

### **Combining physical vapor deposition structuration with dealloying for the creation of a highly efficient SERS platform**

Adrien Chauvin, Walter Puglisi, Damien Thiry, Cristina Satriano, Rony Snyders  
and Carla Bittencourt

*Beilstein J. Nanotechnol.* **2023**, *14*, 83–94. [doi:10.3762/bjnano.14.10](https://doi.org/10.3762/bjnano.14.10)

## Additional figures

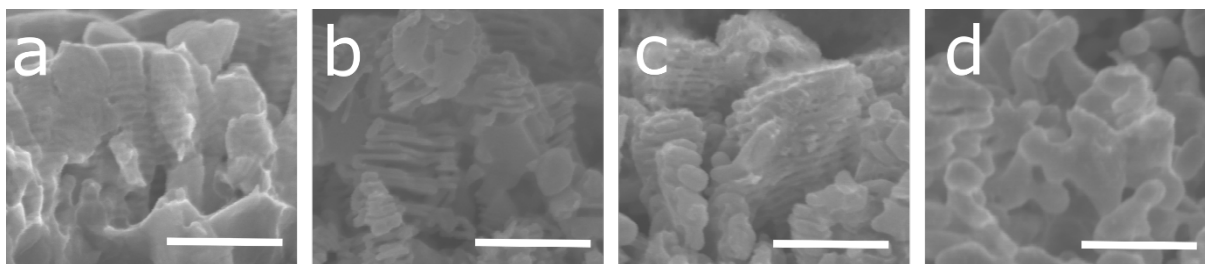

**Figure S1:** High magnification of cross-section SEM images of the (a) initial Ag–Al thin film with 30 atom % of Ag and dealloyed for (b) 10, (c) 30, and (d) 60 min. Scale bar: 250 nm. The high magnification of the cross sections highlights the nanolayer morphological structure and behavior throughout the dealloying process.

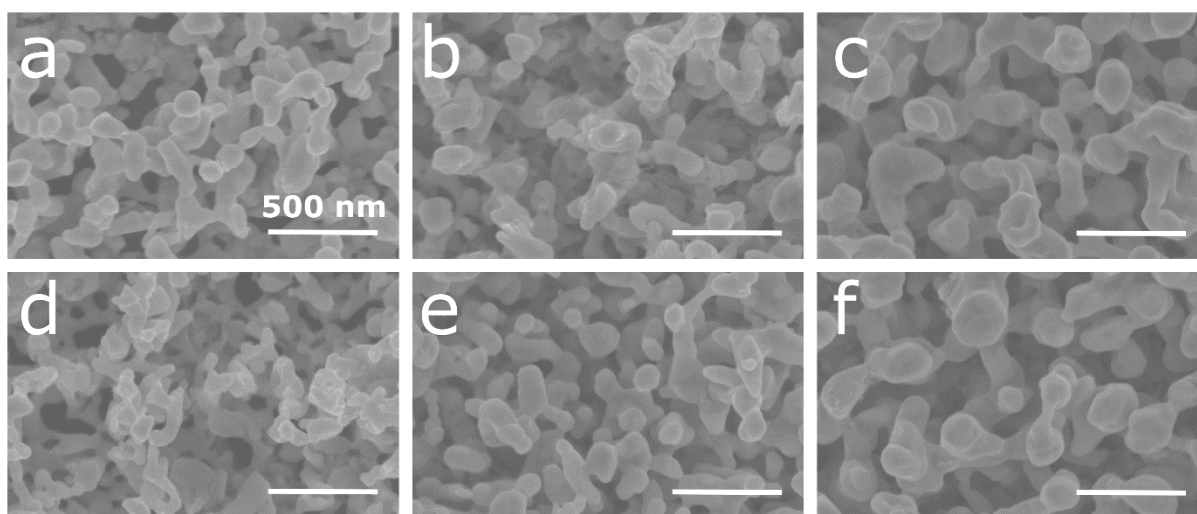

**Figure S2:** Plan view SEM images of Ag–Al thin films dealloyed for 120 min in (a–c) HCl and (d–f) H<sub>3</sub>PO<sub>4</sub> for a sample with an initial composition of (a and d) 18, (b and e) 30, and (c and f) 36 atom % of Ag. Scale bar: 500 nm. Depending on the initial silver content, the morphology after dealloying for 120 min in HCl and H<sub>3</sub>PO<sub>4</sub> does not change. The ligament size increases when the initial silver content is increased.

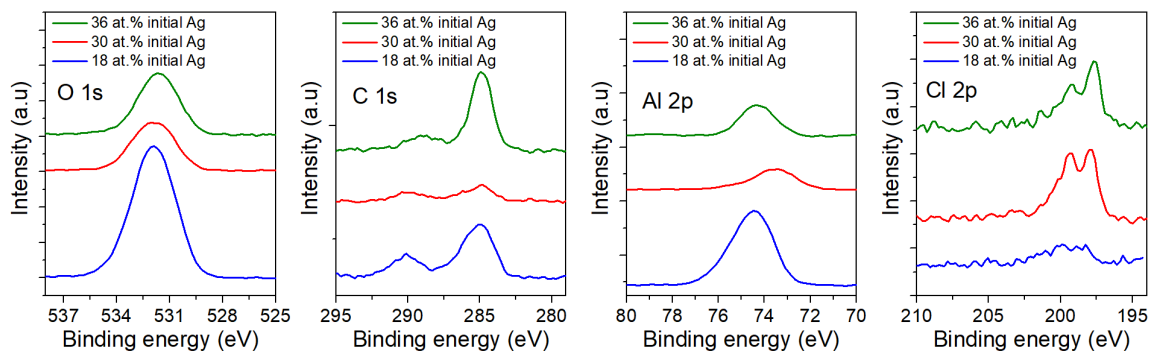

**Figure S3:** XPS (O 1s, C 1s, Al 2p, and Cl 2p) spectra recorded on a Ag–Al alloy thin film dealloyed for 60 min in an HCl solution (1 wt %) with an initial composition of 18, 30, and 36 atom % of Ag.

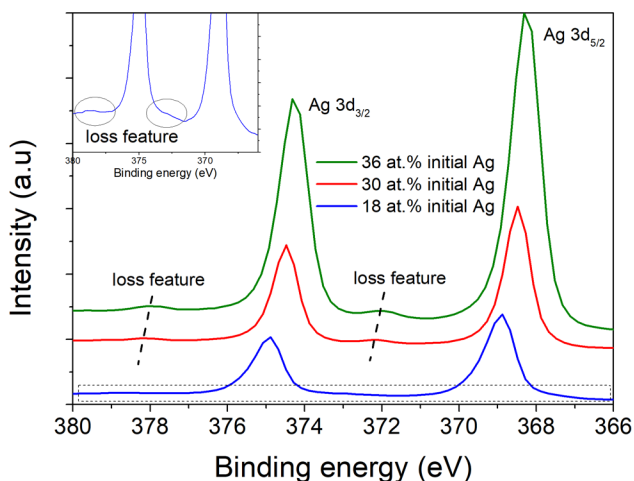

**Figure S4:** XPS Ag 3d recorded on a Ag–Al alloy thin film dealloyed for 60 min in an HCl solution (1 wt %) with an initial composition of 18, 30, and 36 atom % of Ag. The inset is a zoom of the dotted area corresponding to the sample with 18 atom % of initial Ag. All samples after dealloying for 60 min highlight the loss feature characteristic of metallic silver.

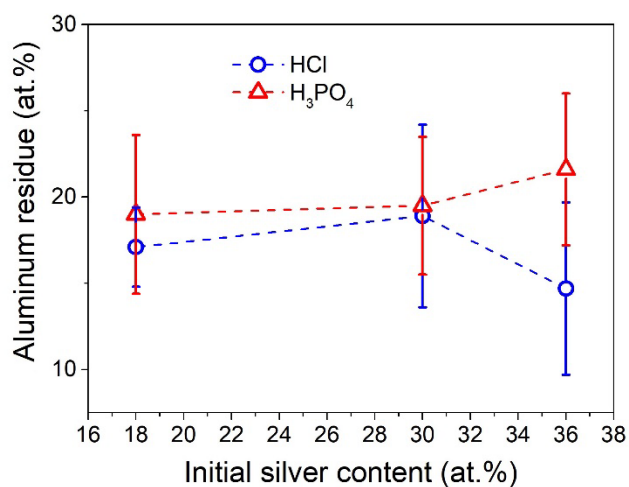

**Figure S5:** Aluminum residue probed by EDX of the Ag–Al alloy thin film dealloyed for 120 min in a H<sub>3</sub>PO<sub>4</sub> solution (10 wt %) and in an HCl solution (1 wt %) with an initial composition of 18, 30, and 36 atom % of Ag.

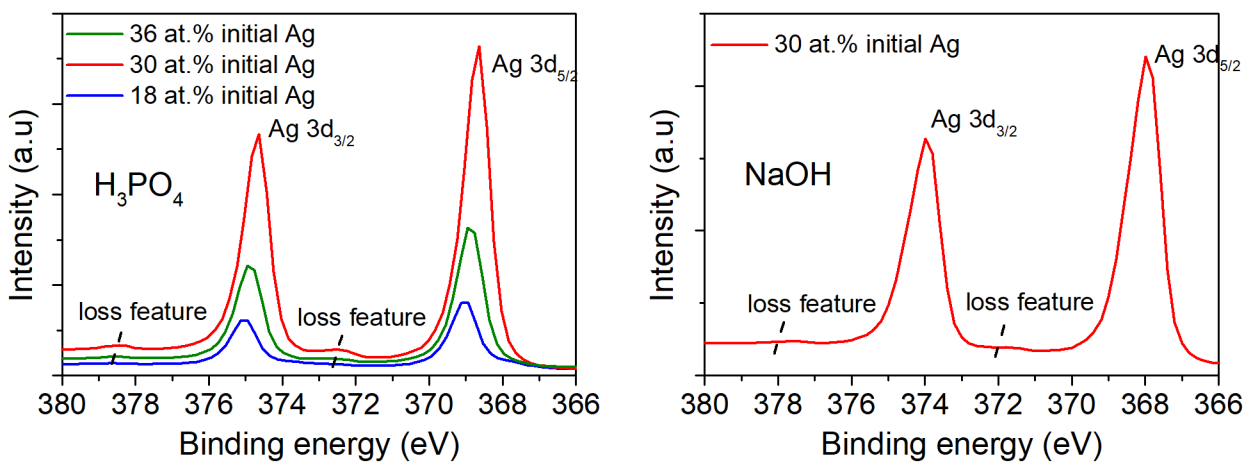

**Figure S6:** XPS analysis of the Ag 3d peak of the Ag/Al alloy thin film dealloyed during 60 min in (left) H<sub>3</sub>PO<sub>4</sub> solution at 10 wt % with an initial composition of 18, 30, and 36 atom % of Ag and in (right) a NaOH solution at 30 wt % with an initial composition of 30 atom % of Ag.

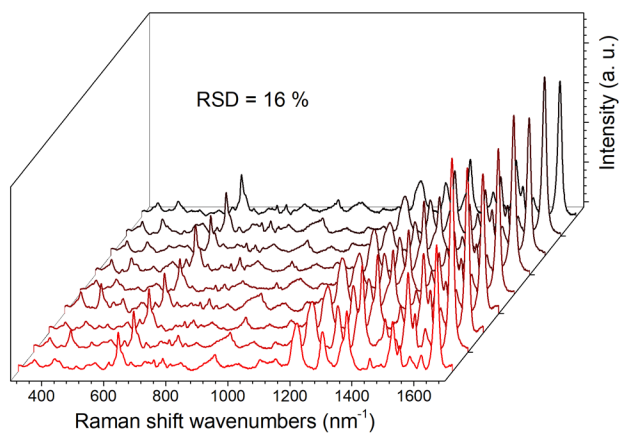

**Figure S7:** Raman spectra of RhB diluted at  $10^{-7}$  mol·L<sup>-1</sup> and recorded in nine different places over the nanoporous silver surface made by dealloying an Ag–Al alloy film with 30 atom % of Ag at the initial state and dealloyed for 60 min in a HCl solution at 1 wt %. Following these analyses, the relative standard deviation (RSD) for the intensity value of the peak at  $1648\text{ cm}^{-1}$  was evaluated to be 16%.
